# Supplementary material for: Analysis of HIV pre-exposure prophylaxis (PrEP) needs and PrEP use in Germany among men who have sex with men
Source: PubMed Central journal article supplement (PMC8895693; doi:10.1007/s10389-022-01699-y), 2022-03-04
Supplement: 10389_2022_1699_MOESM1_ESM.pdf [file 10389_2022_1699_MOESM1_ESM.pdf]

# Analysis of HIV pre-exposure prophylaxis (PrEP) needs and PrEP use among men who have sex with men in Germany

## Supplemental tables and figures

### Reporting of PrEP instead of TasP by MSM diagnosed with HIV

(source: Online survey among people living with HIV in Germany in 2020\* (<https://www.idz-jena.de/forschung/positive-stimmen-20/>))

\* MSM sample with non-steady partners in the last 12 months N=609

Communicating PrEP use to potential sexual partners: 70 (11.5%)

Proportion of MSM diagnosed with HIV not using online dating: 21%

**Table S1a: Calculation of potential size of PrEP reporting bias in MSM online profiles in Germany.**

|                                                                                        |        |
|----------------------------------------------------------------------------------------|--------|
| Estimated total size of people living with diagnosed HIV in Germany                    | 80,000 |
| Age below 60 years                                                                     | 50,000 |
| MSM                                                                                    | 54,000 |
| MSM below 60 years (MSM > 60 severely underrepresented in online profiles)             | 35,000 |
| MSM below 60 years using online dating                                                 | 30,000 |
| Number of MSM diagnosed with HIV possibly indicating PrEP use in their online profiles | 3,450  |

**Table S1b: Calculation of number of PrEP users based on PlanetRomeo PrEP user profiles.**

|                                                                                          |                               |
|------------------------------------------------------------------------------------------|-------------------------------|
| PrEP user profiles on PlanetRomeo as of June 2020                                        | 15,633                        |
| Subtract estimated number of profiles of MSM diagnosed with HIV                          | -3,450                        |
| Assumed 30% of PrEP users do not report PrEP use in their online profiles (see Table S3) | $X = (15,633 - 3,450) * 10/7$ |
| Estimated number of PrEP users based on PlanetRomeo profiles                             | 17,400                        |

**Tab.S2: Number of PrEP pills used by PrApp survey respondents taking PrEP.**

| PrApp survey round                                                                                                                                                                    | Average use per month* | daily use | intermittent use | on demand use | Total |
|---------------------------------------------------------------------------------------------------------------------------------------------------------------------------------------|------------------------|-----------|------------------|---------------|-------|
| <b>Round 1</b>                                                                                                                                                                        | 26+ days               | 1,212     | 57               | 12            |       |
|                                                                                                                                                                                       |                        | 97.19     | 23.08            | 4.82          |       |
|                                                                                                                                                                                       | 12-25 days             | 31        | 99               | 52            |       |
|                                                                                                                                                                                       |                        | 2.49      | 40.08            | 20.88         |       |
|                                                                                                                                                                                       | 1-11 days              | 4         | 91               | 185           |       |
|                                                                                                                                                                                       |                        | 0.32      | 36.84            | 74.3          |       |
|                                                                                                                                                                                       | Total                  | 1,247     | 247              | 249           | 1,743 |
|                                                                                                                                                                                       |                        |           | 100              | 100           | 100   |
|                                                                                                                                                                                       |                        | 71.54     | 14.17            | 14.29         |       |
|                                                                                                                                                                                       |                        |           |                  |               |       |
| <b>Round 2</b>                                                                                                                                                                        | 26+ days               | 1,863     | 53               | 12            |       |
|                                                                                                                                                                                       |                        | 96.48     | 13.38            | 2.71          |       |
|                                                                                                                                                                                       | 12-25 days             | 57        | 127              | 93            |       |
|                                                                                                                                                                                       |                        | 2.95      | 32.07            | 20.99         |       |
|                                                                                                                                                                                       | 1-11days               | 11        | 216              | 338           |       |
|                                                                                                                                                                                       |                        | 0.57      | 54.55            | 76.3          |       |
|                                                                                                                                                                                       | Total                  | 1,931     | 396              | 443           | 2,770 |
|                                                                                                                                                                                       |                        |           | 100              | 100           | 100   |
|                                                                                                                                                                                       |                        | 69.71     | 14.30            | 15.99         |       |
|                                                                                                                                                                                       |                        |           |                  |               |       |
| Average use per week**                                                                                                                                                                |                        |           |                  |               |       |
|                                                                                                                                                                                       |                        | daily use | intermittent use | on demand use |       |
| <b>Round 3</b>                                                                                                                                                                        | 4+ days                | 641       | 38               | 45            |       |
|                                                                                                                                                                                       |                        | 99.69     | 66.67            | 44.55         |       |
|                                                                                                                                                                                       | 0-3days                | 2         | 19               | 56            |       |
|                                                                                                                                                                                       |                        | 0.31      | 33.33            | 55.45         |       |
|                                                                                                                                                                                       | Total                  | 643       | 57               | 101           | 801   |
|                                                                                                                                                                                       |                        |           | 100              | 100           | 100   |
|                                                                                                                                                                                       | 80.27                  | 7.12      | 12.61            |               |       |
| * On average, on how many days per month do you take your PrEP pills?<br>If you don't take PrEP continuously, please indicate your average PrEP use during a month when you take PrEP |                        |           |                  |               |       |
| ** On average, on how many days per week do you take your PrEP pills?<br>If you don't take PrEP continuously, please indicate your average PrEP use during a week when you take PrEP  |                        |           |                  |               |       |

**Tab.S3: Proportion of PrApp respondents announcing PrEP use in online profile.**

| Type of PrEP use | PlanetRomeo          |                      |                      | Grindr               |                        |                      |
|------------------|----------------------|----------------------|----------------------|----------------------|------------------------|----------------------|
|                  | PrApp round1 (n=377) | PrApp round2 (n=478) | PrApp round3 (n=151) | PrApp round1 (n=954) | PrApp round2 (n=1,605) | PrApp round3 (n=391) |
| daily            | 46.0                 | 62.1                 | 72.0                 | 55.1                 | 65.0                   | 67.5                 |
| intermittent     | 31.8                 | 40.0                 | 83.3                 | 41.5                 | 48.9                   | 54.8                 |
| on-demand        | 17.5                 | 45.9                 | 33.3                 | 32.4                 | 46.6                   | 65.1                 |
| Total            | 38.7                 | 55.9                 | 66.9                 | 50.0                 | 59.8                   | 66.2                 |

**Table S4: Proportional regional distribution (by federal state) of all EMIS-2017 participants, EMIS-participants using PrEP, PrApp-Survey participants using PrEP, statutory health insurance PrEP prescriptions, PlanetRomeo profiles in Germany, and PlanetRomeo profiles indicating PrEP use.**

|                                | EMIS-2017<br>respondents<br>with no HIV<br>diagnosis<br>N | Proportion<br>using PrEP<br>by time of<br>data<br>collection<br>(11/2017)<br>% | GayRomeo<br>profiles by<br>06/2020<br>N | Proportion<br>of<br>GayRomeo<br>profiles<br>indicating<br>PrEP use<br>by 06/2020<br>% | PrEP<br>intention<br>distribution<br>% | Distribution<br>of PrEP-<br>users in<br>PrApp<br>survey<br>wave 2<br>(05/2019)<br>(n=2,252)<br>% | Distribution<br>of PrEP-<br>users in<br>PrApp<br>survey<br>wave 3<br>(03/2020)<br>(n=790)<br>% | Distribution<br>of statutory<br>health<br>insurance<br>PrEP<br>prescriptions,<br>last quarter<br>2019<br>% | Distribution<br>of statutory<br>health<br>insurance<br>PrEP<br>prescriptions,<br>first two<br>quarters 2020<br>% | Distribution<br>of<br>GayRomeo<br>PrEP<br>profiles by<br>06/2020<br>% | Estimate<br>for gay<br>population*<br>N |
|--------------------------------|-----------------------------------------------------------|--------------------------------------------------------------------------------|-----------------------------------------|---------------------------------------------------------------------------------------|----------------------------------------|--------------------------------------------------------------------------------------------------|------------------------------------------------------------------------------------------------|------------------------------------------------------------------------------------------------------------|------------------------------------------------------------------------------------------------------------------|-----------------------------------------------------------------------|-----------------------------------------|
| Baden-<br>Wuerttemberg         | 2,240                                                     | 1.38                                                                           | 69,682                                  | 1.42                                                                                  | 11.49                                  | 7.10                                                                                             | 7.34                                                                                           | 5.60                                                                                                       | 5.05                                                                                                             | 6.35                                                                  | 44,651                                  |
| Bavaria                        | 2,672                                                     | 2.02                                                                           | 91,857                                  | 2.34                                                                                  | 13.70                                  | 13.77                                                                                            | 15.95                                                                                          | 12.20                                                                                                      | 12.10                                                                                                            | 13.76                                                                 | 54,061                                  |
| Berlin                         | 2,590                                                     | 6.25                                                                           | 77,590                                  | 5.93                                                                                  | 16.00                                  | 27.49                                                                                            | 22.41                                                                                          | 39.40                                                                                                      | 38.90                                                                                                            | 29.42                                                                 | 59,394                                  |
| Brandenburg                    | 420                                                       | 1.19                                                                           | 10,707                                  | 1.45                                                                                  | 2.19                                   | 0.93                                                                                             | 1.27                                                                                           | 0.00                                                                                                       | 0.05                                                                                                             | 0.99                                                                  | 8,395                                   |
| Bremen                         | 194                                                       | 3.09                                                                           | 8,653                                   | 1.71                                                                                  | 1.01                                   | 0.49                                                                                             | 0.63                                                                                           | 0.50                                                                                                       | 0.70                                                                                                             | 0.95                                                                  | 3,930                                   |
| Hamburg                        | 820                                                       | 2.80                                                                           | 28,848                                  | 3.31                                                                                  | 4.14                                   | 6.31                                                                                             | 5.44                                                                                           | 6.90                                                                                                       | 6.90                                                                                                             | 6.10                                                                  | 17,713                                  |
| Hesse                          | 1,516                                                     | 2.44                                                                           | 53,993                                  | 2.22                                                                                  | 7.26                                   | 8.48                                                                                             | 9.24                                                                                           | 8.00                                                                                                       | 8.25                                                                                                             | 7.68                                                                  | 31,422                                  |
| Mecklenburg-<br>West.Pomerania | 318                                                       | 0.31                                                                           | 9,785                                   | 0.97                                                                                  | 1.41                                   | 0.53                                                                                             | 1.14                                                                                           | 0.20                                                                                                       | 0.15                                                                                                             | 0.61                                                                  | 6,329                                   |
| Lower Saxony                   | 1,422                                                     | 0.98                                                                           | 47,838                                  | 1.42                                                                                  | 6.93                                   | 3.60                                                                                             | 5.70                                                                                           | 3.10                                                                                                       | 3.10                                                                                                             | 4.34                                                                  | 28,175                                  |
| North Rhine-<br>Westphalia     | 3,842                                                     | 1.80                                                                           | 141,360                                 | 2.27                                                                                  | 20.14                                  | 21.54                                                                                            | 20.76                                                                                          | 18.80                                                                                                      | 19.35                                                                                                            | 20.50                                                                 | 79,376                                  |
| Rhineland-<br>Palatinate       | 658                                                       | 1.06                                                                           | 27,611                                  | 1.66                                                                                  | 3.45                                   | 2.66                                                                                             | 3.80                                                                                           | 0.80                                                                                                       | 0.85                                                                                                             | 2.92                                                                  | 13,156                                  |
| Saarland                       | 222                                                       | 1.35                                                                           | 7,645                                   | 1.83                                                                                  | 1.22                                   | 0.84                                                                                             | 0.63                                                                                           | 0.80                                                                                                       | 0.80                                                                                                             | 0.90                                                                  | 4,520                                   |
| Saxony                         | 1,019                                                     | 0.88                                                                           | 26,628                                  | 1.62                                                                                  | 4.86                                   | 4.04                                                                                             | 3.42                                                                                           | 2.60                                                                                                       | 2.60                                                                                                             | 2.76                                                                  | 20,499                                  |
| Saxony-Anhalt                  | 381                                                       | 0.52                                                                           | 11,974                                  | 1.03                                                                                  | 1.72                                   | 0.71                                                                                             | 0.63                                                                                           | 0.50                                                                                                       | 0.55                                                                                                             | 0.79                                                                  | 7,454                                   |
| Schleswig-<br>Holstein         | 681                                                       | 1.62                                                                           | 16,334                                  | 1.29                                                                                  | 2.91                                   | 0.84                                                                                             | 1.27                                                                                           | 0.20                                                                                                       | 0.30                                                                                                             | 1.35                                                                  | 13,395                                  |
| Thuringia                      | 364                                                       | 0.27                                                                           | 12,818                                  | 0.71                                                                                  | 1.57                                   | 0.67                                                                                             | 0.38                                                                                           | 0.30                                                                                                       | 0.35                                                                                                             | 0.58                                                                  | 6,956                                   |
| Total                          | 19,359                                                    | 2.25                                                                           | 643,323                                 | 2.43                                                                                  | 100.00                                 | 100.00                                                                                           | 100.01                                                                                         | 99.90                                                                                                      | 100.00                                                                                                           | 100.00                                                                | 399,426                                 |

\*(1,5% of adult male population, EMIS distribution, non-gay-identified MSM excluded)

**Table S5: Univariable and multivariable analysis of factors associated with PrEP use intentions.**

|                                                          | OR          | 95% CI |      | p     | aOR          | 95% CI |      | p     |
|----------------------------------------------------------|-------------|--------|------|-------|--------------|--------|------|-------|
| <b>Demographics</b>                                      |             |        |      |       |              |        |      |       |
| <b>Age</b>                                               |             |        |      |       |              |        |      |       |
| 20 and above                                             | ref.        |        |      |       | ref.         |        |      |       |
| age below 20                                             | <b>1.43</b> | 1.25   | 1.64 | 0.000 | <b>1.42</b>  | 1.21   | 1.67 | 0.000 |
| <b>Settlement size</b>                                   |             |        |      |       | not included |        |      |       |
| A very big city or town (a million or more)              | 0.98        | 0.89   | 1.07 | 0.659 |              |        |      |       |
| A big city or town (500,000-999,999)                     | 0.99        | 0.89   | 1.10 | 0.867 |              |        |      |       |
| A medium-sized city or town (100,000-499,999)            | 0.98        | 0.89   | 1.08 | 0.701 |              |        |      |       |
| A small city or town (10,000-99,999)                     | 0.98        | 0.89   | 1.08 | 0.675 |              |        |      |       |
| Village or countryside (below 10,000)                    | ref.        |        |      |       |              |        |      |       |
| <b>Federal state</b>                                     |             |        |      |       | not included |        |      |       |
| Baden-Wurtemberg                                         | 0.91        | 0.81   | 1.03 | 0.148 |              |        |      |       |
| Bavaria                                                  | 0.97        | 0.87   | 1.09 | 0.658 |              |        |      |       |
| Berlin                                                   | ref.        |        |      |       |              |        |      |       |
| Brandenburg                                              | 1.12        | 0.90   | 1.39 | 0.309 |              |        |      |       |
| Bremen                                                   | 0.91        | 0.66   | 1.25 | 0.543 |              |        |      |       |
| Hamburg                                                  | <b>0.81</b> | 0.68   | 0.96 | 0.017 |              |        |      |       |
| Hesse                                                    | 0.89        | 0.77   | 1.02 | 0.084 |              |        |      |       |
| Mecklenburg-Western Pomerania                            | 1.00        | 0.78   | 1.28 | 0.993 |              |        |      |       |
| Lower Saxony                                             | 0.91        | 0.79   | 1.05 | 0.203 |              |        |      |       |
| North Rhine-Westphalia                                   | 0.95        | 0.86   | 1.06 | 0.364 |              |        |      |       |
| Rhineland-Palatinate                                     | 0.97        | 0.81   | 1.16 | 0.721 |              |        |      |       |
| Saarland                                                 | 1.03        | 0.77   | 1.38 | 0.823 |              |        |      |       |
| Saxony                                                   | 0.92        | 0.78   | 1.07 | 0.269 |              |        |      |       |
| Saxony-Anhalt                                            | 1.08        | 0.86   | 1.35 | 0.528 |              |        |      |       |
| Schleswig-Holstein                                       | 0.87        | 0.72   | 1.04 | 0.127 |              |        |      |       |
| Thuringia                                                | 0.99        | 0.79   | 1.26 | 0.956 |              |        |      |       |
| <b>Level of education</b>                                |             |        |      |       | not included |        |      |       |
| Low (less than secondary)                                | ref.        |        |      |       |              |        |      |       |
| Mid (at least upper secondary; 2-5 years post 16)        | 1.08        | 0.89   | 1.31 | 0.462 |              |        |      |       |
| High (first stage of tertiary or more; 6+ years post 16) | 0.88        | 0.72   | 1.06 | 0.182 |              |        |      |       |
| <b>Partnership status</b>                                |             |        |      |       |              |        |      |       |
| I have a steady partner                                  | ref.        |        |      |       | ref.         |        |      |       |
| I am single                                              | <b>1.44</b> | 1.35   | 1.53 | 0.000 | <b>1.35</b>  | 1.26   | 1.45 | 0.000 |
| I'm not sure/ it's complicated                           | <b>1.74</b> | 1.55   | 1.97 | 0.000 | <b>1.56</b>  | 1.37   | 1.79 | 0.000 |
| <b>Sex for money</b>                                     |             |        |      |       | not included |        |      |       |
| not sold sex or less than 3 times                        | ref.        |        |      |       |              |        |      |       |
| Sold sex at least 3 times last 12months                  | <b>1.94</b> | 1.58   | 2.39 | 0.000 |              |        |      |       |
| <b>Outness</b>                                           |             |        |      |       | not included |        |      |       |
| All or almost all                                        | <b>0.83</b> | 0.75   | 0.92 | 0.000 |              |        |      |       |
| More than half                                           | 0.89        | 0.79   | 1.00 | 0.050 |              |        |      |       |
| Less than half                                           | 0.95        | 0.83   | 1.09 | 0.455 |              |        |      |       |
| Few                                                      | 1.05        | 0.93   | 1.18 | 0.451 |              |        |      |       |
| None                                                     | ref.        |        |      |       |              |        |      |       |
| <b>Behaviours</b>                                        |             |        |      |       |              |        |      |       |
| <b>Partner number</b>                                    | OR          | 95% CI |      | p     | aOR          | 95% CI |      | p     |
| 0-1                                                      | ref.        |        |      |       |              |        |      |       |
| 2-4                                                      | <b>1.38</b> | 1.27   | 1.51 | 0.000 | <b>1.31</b>  | 1.18   | 1.45 | 0.000 |
| 5-7                                                      | <b>1.59</b> | 1.44   | 1.75 | 0.000 | <b>1.49</b>  | 1.33   | 1.66 | 0.000 |
| 8-10                                                     | <b>1.86</b> | 1.65   | 2.10 | 0.000 | <b>1.66</b>  | 1.45   | 1.90 | 0.000 |
| 11-20                                                    | <b>2.03</b> | 1.84   | 2.24 | 0.000 | <b>1.84</b>  | 1.64   | 2.07 | 0.000 |
| 21-30                                                    | <b>2.66</b> | 2.30   | 3.07 | 0.000 | <b>2.36</b>  | 2.01   | 2.77 | 0.000 |
| 31-40                                                    | <b>2.79</b> | 2.26   | 3.44 | 0.000 | <b>2.46</b>  | 1.95   | 3.09 | 0.000 |
| 41-50                                                    | <b>3.58</b> | 2.72   | 4.71 | 0.000 | <b>3.18</b>  | 2.36   | 4.29 | 0.000 |
| >50                                                      | <b>4.04</b> | 3.37   | 4.83 | 0.000 | <b>3.51</b>  | 2.88   | 4.28 | 0.000 |

|                                                     |             |      |      |       |              |      |      |       |
|-----------------------------------------------------|-------------|------|------|-------|--------------|------|------|-------|
| <b>Sex is always as safe as I want</b>              |             |      |      |       |              |      |      |       |
| Strongly disagree                                   | <b>1.55</b> | 1.23 | 1.96 | 0.000 | <b>1.62</b>  | 1.24 | 2.12 | 0.000 |
| Disagree                                            | <b>2.66</b> | 2.31 | 3.06 | 0.000 | <b>2.16</b>  | 1.84 | 2.53 | 0.000 |
| Neither or not sure                                 | <b>1.82</b> | 1.58 | 2.10 | 0.000 | <b>1.91</b>  | 1.60 | 2.27 | 0.000 |
| Agree                                               | <b>1.49</b> | 1.40 | 1.59 | 0.000 | <b>1.36</b>  | 1.27 | 1.46 | 0.000 |
| Strongly agree                                      | ref.        |      |      |       |              |      |      |       |
| <b>Multipartner sex last non-steady partner sex</b> |             |      |      |       | not included |      |      |       |
| It was me and one non-steady partner                | ref.        |      |      |       |              |      |      |       |
| It was me, my partner and a non-steady partner      | <b>0.82</b> | 0.72 | 0.95 | 0.006 |              |      |      |       |
| It was me and 2 non-steady partners (a threesome)   | <b>1.40</b> | 1.23 | 1.60 | 0.000 |              |      |      |       |
| It was me and three or more other people            | <b>1.63</b> | 1.41 | 1.89 | 0.000 |              |      |      |       |
| Morbidities                                         |             |      |      |       |              |      |      |       |
| <b>Sexual unhappiness</b>                           |             |      |      |       | not included |      |      |       |
| 1                                                   | ref.        |      |      |       |              |      |      |       |
| 2                                                   | <b>0.81</b> | 0.68 | 0.97 | 0.020 |              |      |      |       |
| 3                                                   | 1.02        | 0.88 | 1.18 | 0.835 |              |      |      |       |
| 4                                                   | 0.99        | 0.85 | 1.15 | 0.868 |              |      |      |       |
| 5                                                   | 1.10        | 0.94 | 1.29 | 0.241 |              |      |      |       |
| 6                                                   | 1.00        | 0.86 | 1.17 | 0.983 |              |      |      |       |
| 7                                                   | 1.01        | 0.86 | 1.20 | 0.872 |              |      |      |       |
| 8                                                   | 0.97        | 0.82 | 1.15 | 0.708 |              |      |      |       |
| 9                                                   | 0.87        | 0.70 | 1.07 | 0.184 |              |      |      |       |
| 10                                                  | 1.00        | 0.81 | 1.23 | 0.975 |              |      |      |       |
| <b>Depression/Anxiety</b>                           |             |      |      |       |              |      |      |       |
| None                                                | ref.        |      |      |       |              |      |      |       |
| Mild                                                | <b>1.16</b> | 1.09 | 1.24 | 0.000 | 1.07         | 0.99 | 1.15 | 0.087 |
| Moderate                                            | <b>1.17</b> | 1.05 | 1.31 | 0.005 | 1.02         | 0.90 | 1.17 | 0.726 |
| Severe                                              | <b>1.27</b> | 1.11 | 1.45 | 0.000 | <b>1.22</b>  | 1.04 | 1.44 | 0.015 |
| <b>Sex under the influence of alcohol/drugs</b>     |             |      |      |       |              |      |      |       |
| less than half                                      | ref.        |      |      |       |              |      |      |       |
| more than half                                      | <b>1.71</b> | 1.55 | 1.90 | 0.000 | <b>1.35</b>  | 1.21 | 1.50 | 0.000 |
| Interventions                                       |             |      |      |       |              |      |      |       |
| <b>PrEP awareness (ever heard of PrEP)</b>          |             |      |      |       |              |      |      |       |
| already heard of PrEP                               | ref.        |      |      |       |              |      |      |       |
| unaware                                             | <b>0.81</b> | 0.76 | 0.86 | 0.000 | <b>0.93</b>  | 0.87 | 1.00 | 0.047 |
| cons.                                               |             |      |      |       | 0.22         | 0.20 | 0.24 | 0.000 |

We identified the factors associated with PrEP use intention in EMIS-2017 by constructing a multivariable regression model. The univariate analysis shows that settlement size, federal state, education and sexual unhappiness have no impact on the intention to use PrEP. The multivariable regression identifies partner numbers, partnership status, perceived safe sex self-efficacy, and PrEP awareness as key factors determining PrEP use intention. Likewise, high levels of sexualised substance use, severe depression, multipartner sex, and age below 20 increase the intention to use PrEP.

**Table S6: PrEP-need groups in EMIS-2017.**

|                               | intention, no reported risk* | intention and risk | no intention, but risk | no intention, no reported risk |
|-------------------------------|------------------------------|--------------------|------------------------|--------------------------------|
| Baden-Wuerttemberg            | 257                          | 232                | 200                    | 1,551                          |
| Bavaria                       | 319                          | 264                | 220                    | 1,869                          |
| Berlin                        | 296                          | 385                | 283                    | 1,626                          |
| Brandenburg                   | 50                           | 43                 | 29                     | 298                            |
| Bremen                        | 21                           | 22                 | 24                     | 127                            |
| Hamburg                       | 91                           | 85                 | 91                     | 553                            |
| Hesse                         | 166                          | 143                | 132                    | 1,075                          |
| Mecklenburg-Western Pomerania | 30                           | 30                 | 32                     | 226                            |
| Lower Saxony                  | 163                          | 132                | 113                    | 1,014                          |
| North Rhine-Westphalia        | 448                          | 409                | 376                    | 2,609                          |
| Rhineland-Palatinate          | 72                           | 75                 | 50                     | 461                            |
| Saarland                      | 24                           | 28                 | 27                     | 143                            |
| Saxony                        | 108                          | 99                 | 89                     | 723                            |
| Saxony-Anhalt                 | 37                           | 36                 | 34                     | 274                            |
| Schleswig-Holstein            | 61                           | 63                 | 73                     | 484                            |
| Thuringia                     | 36                           | 31                 | 40                     | 257                            |
| missing                       | 166                          | 135                | 99                     | 886                            |
| BL distributed N              | 2,179                        | 2,077              | 1,813                  | 13,290                         |
| Total                         | 2,345                        | 2,212              | 1,912                  | 14,176                         |

**Fig.S1a-d: Comparison regarding CAI partner numbers, HIV test recency, disagreement with the statement “The sex I have is always as safe as I want”, and PrEP awareness between the four groups 1) intention to use PrEP, low sexual risk\*; 2) intention to use PrEP, moderate/high sexual risk; 3) no intention to use PrEP, moderate/high sexual risk; 4) no intention to use PrEP, low sexual risk.**

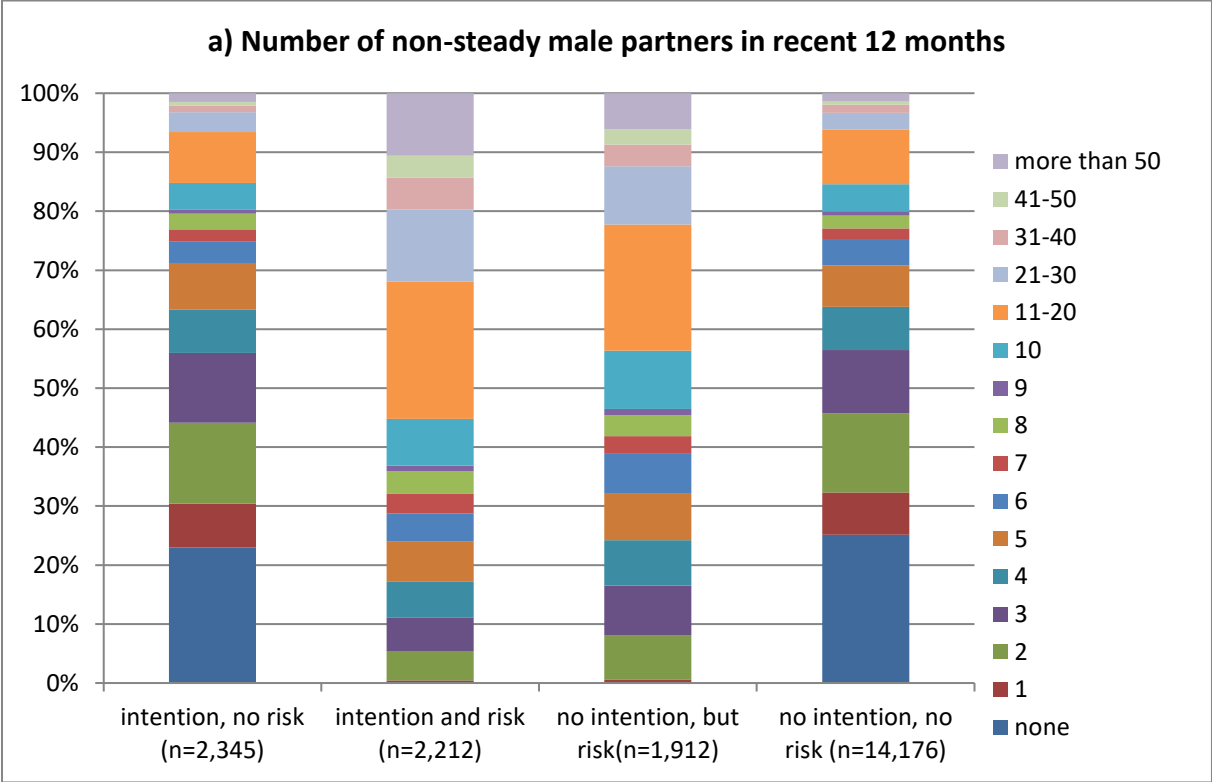



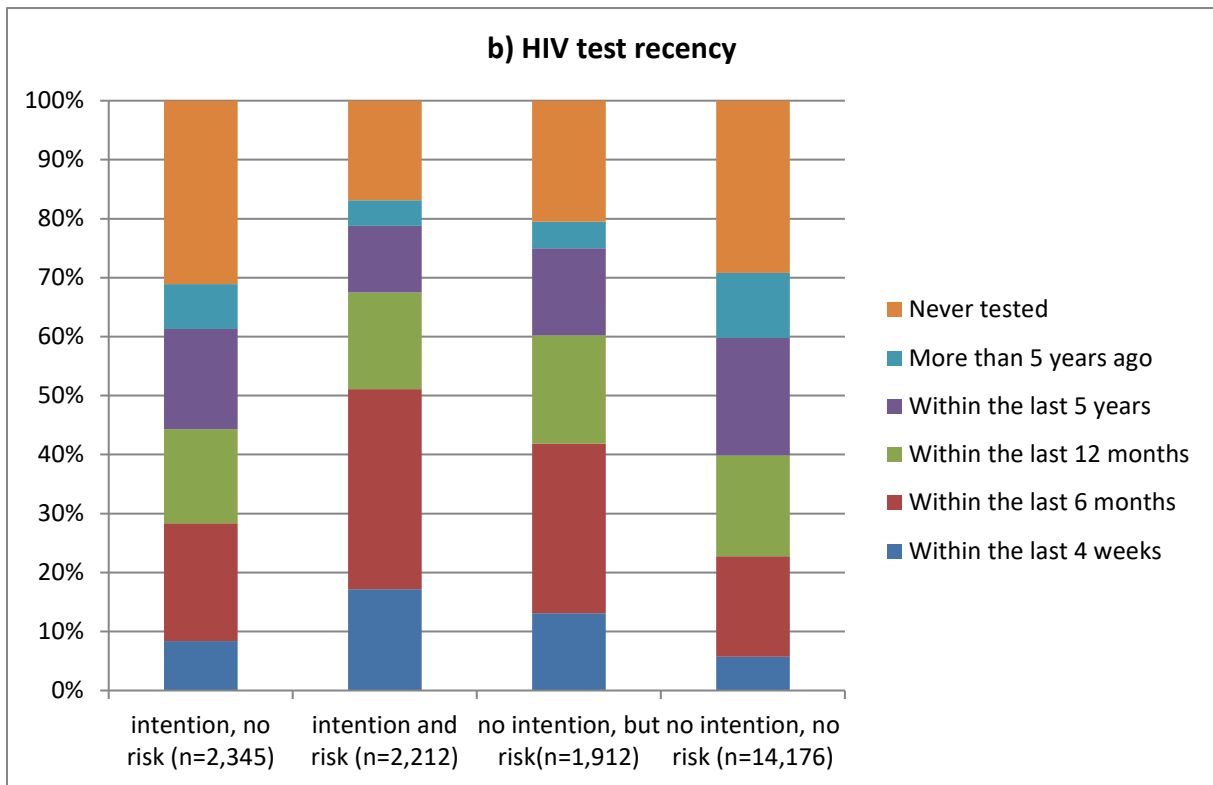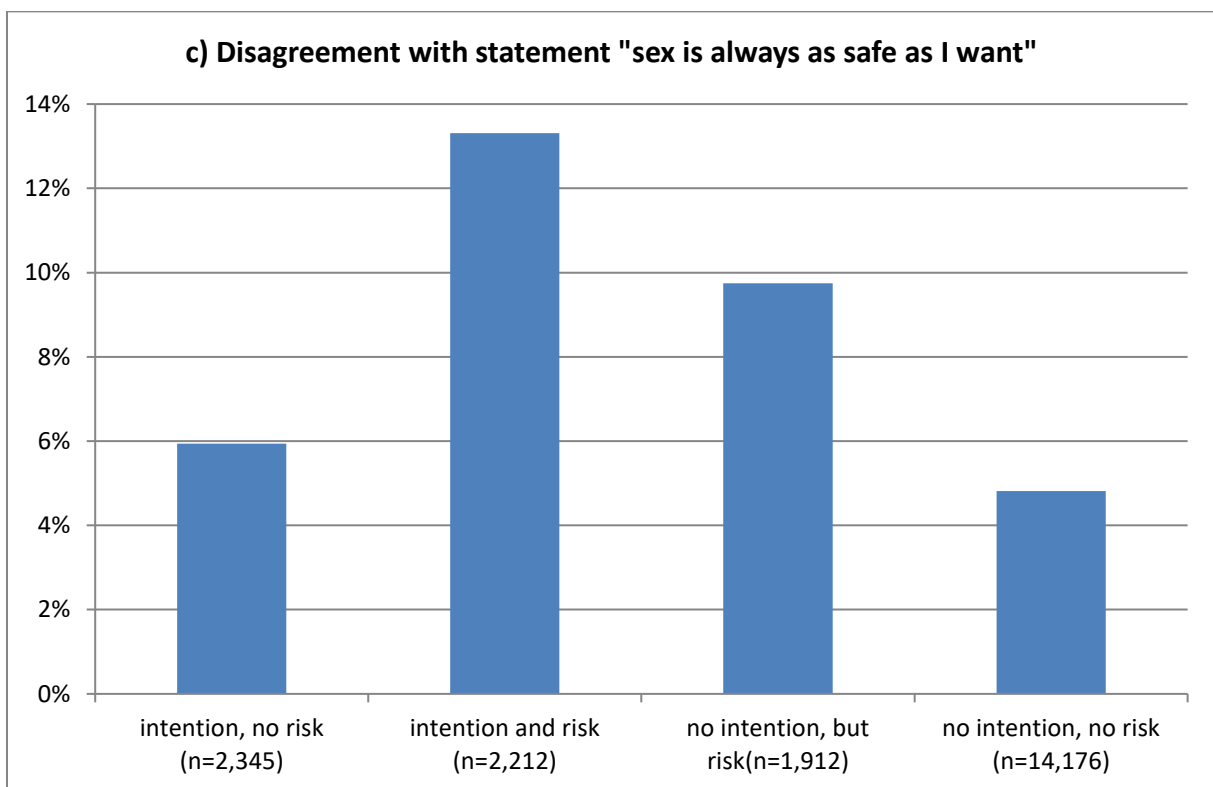

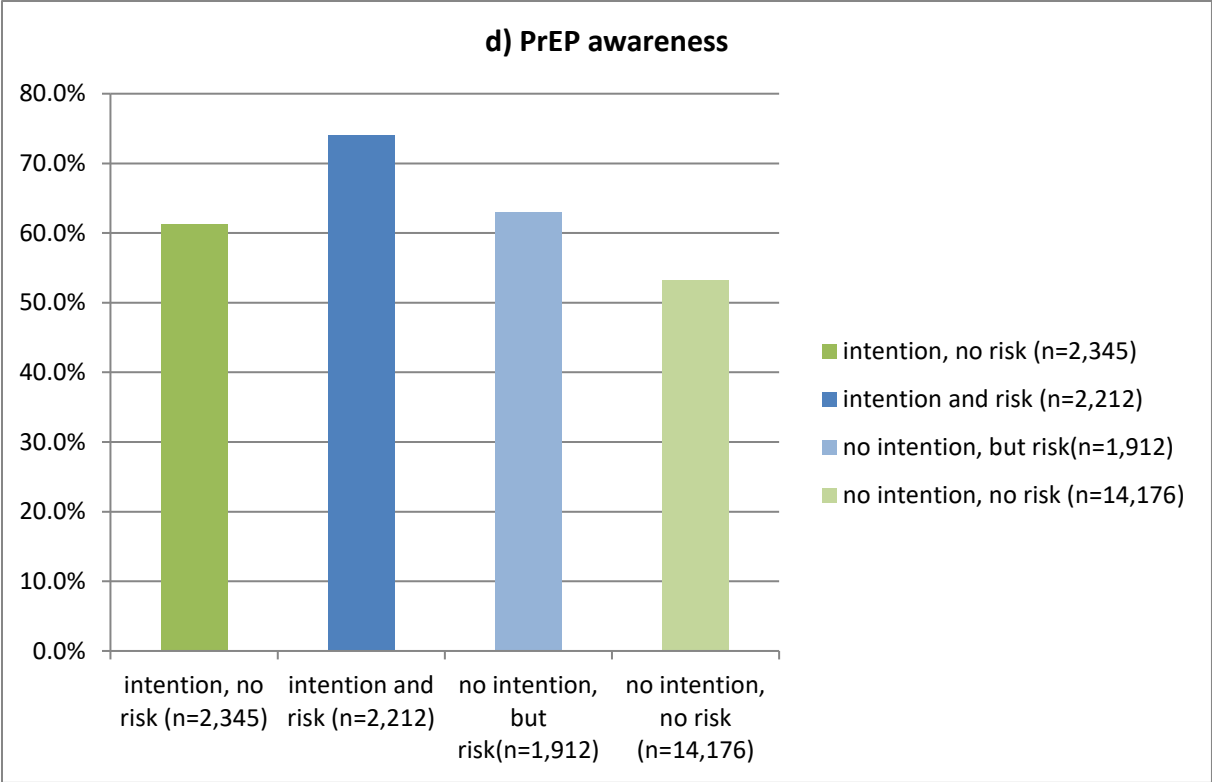

\* respondents in the group „intention, no risk” who indicated less than 2 non-steady partners in the recent 12 months were *not* excluded for these figures.
